# Supplementary material
Source: PubMed Central journal article supplement (PMC5988982)
Supplement: NIHMS961710-supplement-1.pdf [file NIHMS961710-supplement-1.pdf]

## Supplementary Information

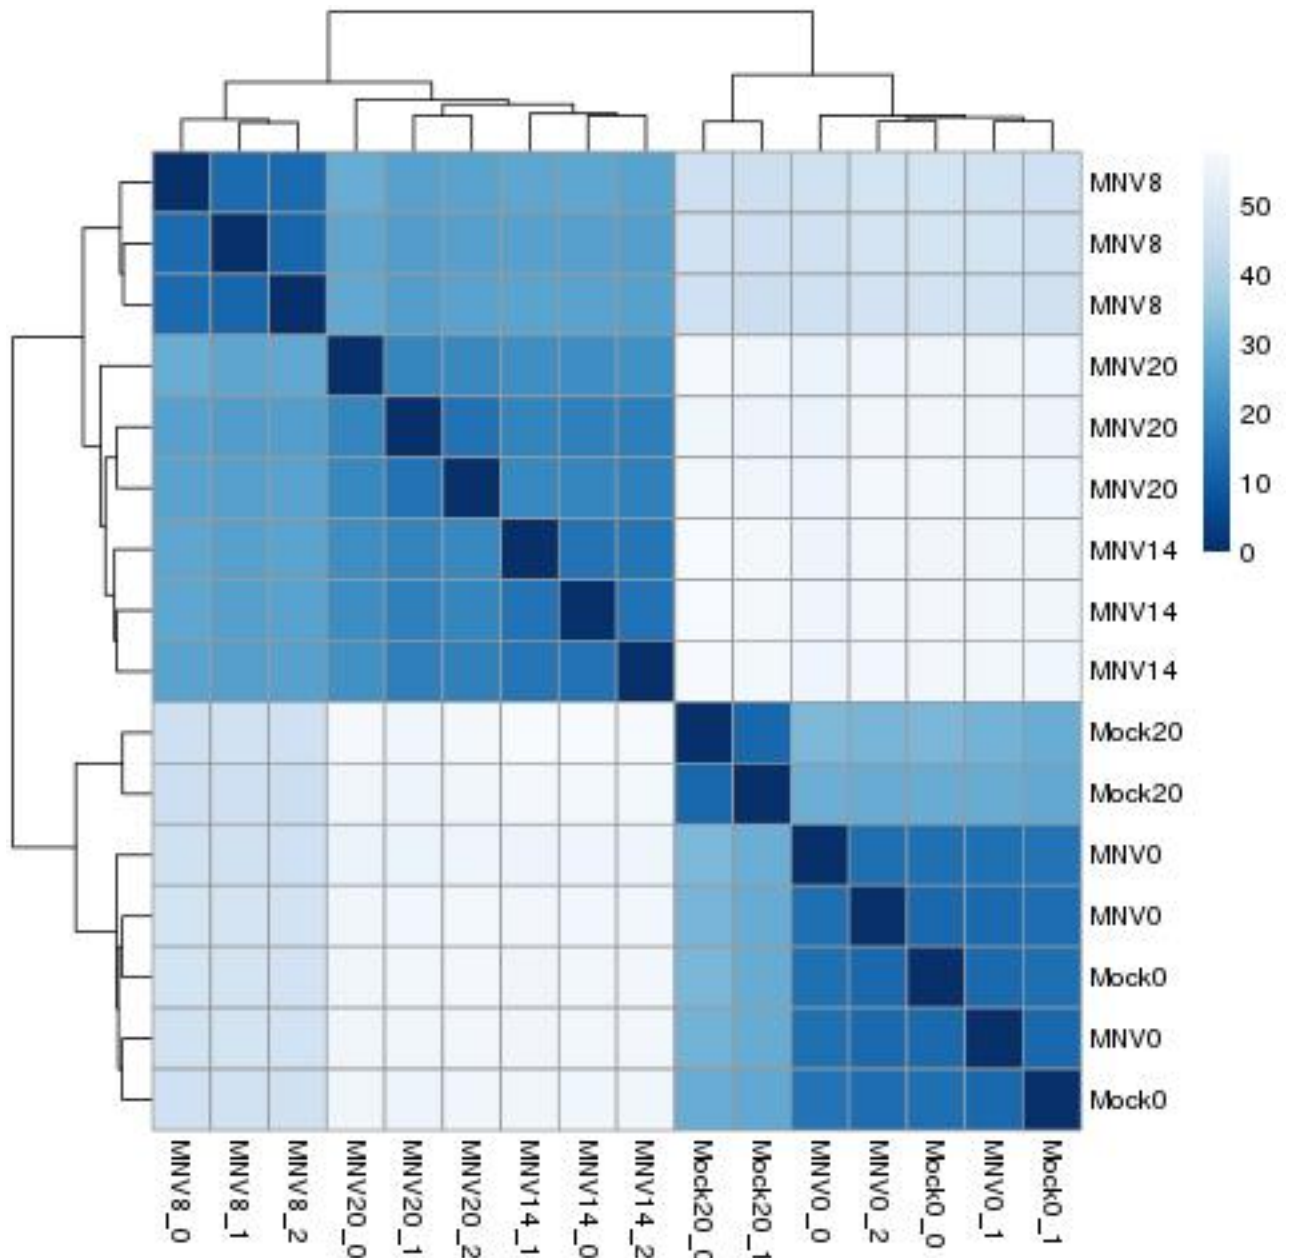

**Figure S1.** The correlation between the RAW264.7 samples analyzed by RNA-seq represented by heat map. Higher (lighter) values correspond to lower correlation.

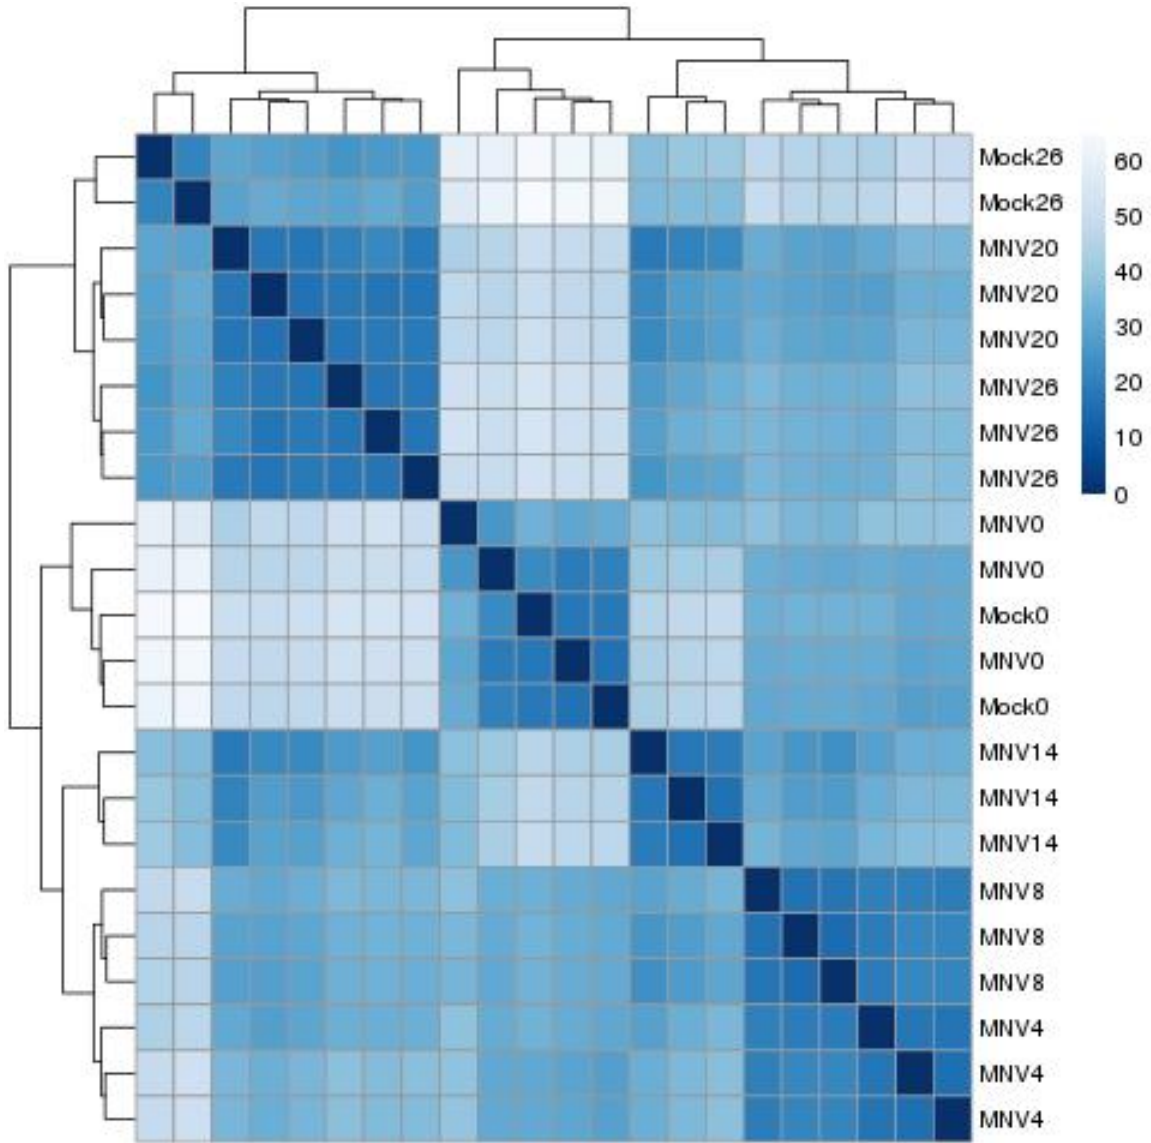

**Figure S2.** The correlation between the BMDM samples analyzed by RNA-seq represented by heat map. Higher (lighter) values correspond to lower correlation.

**Table S1.** Spearman Rank correlation of QPCR and RNA-seq values

| <b>Gene Name</b>          | <b>Spearman Corr. Coeff.</b> | <b>P-value</b> |
|---------------------------|------------------------------|----------------|
| <i>Abca1</i>              | 0.87                         | <0.001         |
| <i>Casp1</i>              | 0.88                         | <0.001         |
| <i>Casp8</i>              | 0.59                         | 0.02           |
| <i>Fas</i>                | 0.86                         | <0.001         |
| <i>Ifnb1</i> <sup>1</sup> | 0.95                         | <0.001         |
| <i>Irf3</i>               | 0.50                         | 0.05           |
| <i>Irf7</i>               | 0.87                         | <0.001         |
| <i>Stat1</i>              | 0.71                         | 0.004          |
| <i>Tnfsf10</i>            | 0.85                         | <0.001         |

<sup>1</sup> Reference gene *LARS*
